# Supplementary material for: Defining Peer Roles and Status Among Community Health Workers and Peer Support Specialists in Integrated Systems of Care
Source: Atypon-hosted journal article supplement (doi:10.1176/appi.ps.201600378), 2017-07-17
Supplement: appi.ps.201600378.ds001.pdf [file appi.ps.201600378.ds001.pdf]

|                                     |                                                                                                                                                                                                                                                                 |                             |                                                          |                                                       |                                                                      |
|-------------------------------------|-----------------------------------------------------------------------------------------------------------------------------------------------------------------------------------------------------------------------------------------------------------------|-----------------------------|----------------------------------------------------------|-------------------------------------------------------|----------------------------------------------------------------------|
| <b>Primary Roles of CHW and PSS</b> | Education and Connection to Treatment Services                                                                                                                                                                                                                  | Prevention to Avoid Illness | Addressing Hopelessness and Trauma of Illness Conditions | Activation to Support wellness and Health Improvement | Promoting Self-care, Shared Decision-making, and Care Plan Adherence |
| Community Health Worker (CHW)       | <div style="display: flex; justify-content: space-between;"> <div style="width: 48%;"> <p>CHW - Primary Roles and Peer-status<br/>High &gt; Low</p> </div> <div style="width: 48%;"> <p>PSS - Primary Roles and Peer-status<br/>Low &gt; High</p> </div> </div> |                             |                                                          |                                                       |                                                                      |
| Peer Support Specialist (PSS)       |                                                                                                                                                                                                                                                                 |                             |                                                          |                                                       |                                                                      |
| <b>Peer Status CHW and PSS</b>      | Racial and Ethnic Similarities                                                                                                                                                                                                                                  | Cultural Similarities       | Living in the Same Community                             | Common Life Situations                                | Common Health Conditions                                             |
